# Supplementary material
Source: ML conference proceedings conference paper supplement (https://proceedings.mlr.press/v33/crammer14.html)
Supplement: Supplementary file 1 [file crammer14-supp.pdf]

## A Supplementary Material

### A.1 Technical Matter

We use the following inequality, defined for  $x \in [0, 1]$ .

$$\sqrt{1-x} + \sqrt{1+x} \leq 2. \quad (12)$$

From concavity of  $\sqrt{1+z}$  it follows  $\sqrt{1+z} \leq 1 + \frac{1}{2}z$  and thus we have,  $\sqrt{1-x} + \sqrt{1+x} \leq 1 - \frac{1}{2}x + 1 + \frac{1}{2}x = 2$ .

### A.2 Proof of Thm. 1

**Proof:** Define

$$\Psi_i(\mathbf{v}) = \frac{1}{2} \|\mathbf{v}\|^2 + \sum_{j=1}^i \frac{Z_j Q_j}{2} (y_j - \mathbf{v}^\top \mathbf{x}_j)^2,$$

Thm .3 of Cesa-Bianchi et al [11] states,

$$\begin{aligned} & \frac{1}{2} Z_i Q_i (y_i - \hat{p}_i)^2 \\ &= \inf_{\mathbf{v}} \Psi_{i+1}(\mathbf{v}) - \inf_{\mathbf{v}} \Psi_i(\mathbf{v}) \\ & \quad + \frac{Z_i Q_i}{2} \mathbf{x}_i^\top A_i^{-1} \mathbf{x}_i - \frac{Z_i Q_i}{2} (\mathbf{x}_i^\top A_{i-1}^{-1} \mathbf{x}_i) \hat{p}_i^2 \\ &= \inf_{\mathbf{v}} \Psi_{i+1}(\mathbf{v}) - \inf_{\mathbf{v}} \Psi_i(\mathbf{v}) + \frac{Z_i Q_i}{2} \frac{r_i}{1+r_i} - \frac{Z_i Q_i}{2} r_i \hat{p}_i^2. \end{aligned}$$

Summing over  $i$ ,

$$\begin{aligned} & \frac{1}{2} \sum_i Z_i Q_i (y_i - \hat{p}_i)^2 \\ & \leq \inf_{\mathbf{v}} \Psi_{m+1}(\mathbf{v}) + \sum_i \frac{Z_i Q_i}{2} \frac{r_i}{1+r_i} - \sum_i \frac{Z_i Q_i}{2} r_i \hat{p}_i^2 \\ & \leq \frac{1}{2} \|\mathbf{v}\|^2 + \sum_{i=1}^m \frac{Z_i Q_i}{2} (y_i - \mathbf{v}^\top \mathbf{x}_i)^2 \\ & \quad + \sum_i \frac{Z_i Q_i}{2} \frac{r_i}{1+r_i} - \sum_i \frac{Z_i Q_i}{2} r_i \hat{p}_i^2. \end{aligned}$$

Expanding the two square terms, and rearranging we get,

$$\begin{aligned} & \frac{1}{2} \sum_i Z_i Q_i \left( \hat{p}_i^2 - 2y_i \hat{p}_i - \frac{r_i}{1+r_i} + r_i \hat{p}_i^2 \right) \\ & \leq \frac{1}{2} \|\mathbf{v}\|^2 + \sum_{i=1}^m \frac{Z_i Q_i}{2} \mathbf{v}^\top \mathbf{x}_i \mathbf{x}_i^\top \mathbf{v} - \sum_{i=1}^m Z_i Q_i y_i \mathbf{v}^\top \mathbf{x}_i \\ & = \frac{1}{2} \mathbf{v}^\top \left( \mathbf{I} + \sum_{i=1}^m Z_i Q_i \mathbf{x}_i \mathbf{x}_i^\top \right) \mathbf{v} - \sum_{i=1}^m Z_i Q_i y_i \mathbf{v}^\top \mathbf{x}_i \\ & = \frac{1}{2} \mathbf{v}^\top A_{\mathbf{v}} \mathbf{v} - \sum_{i=1}^m Z_i Q_i y_i \mathbf{v}^\top \mathbf{x}_i, \quad (13) \end{aligned}$$

where we used (9) for the last step.

Since  $\mathbf{v}$  is arbitrary we can replace it with a scaled version  $c\mathbf{v}$ . Using a trivial relation  $1-x \leq \max\{1-x, 0\}$  yields,

$$-Z_i Q_i c y_i \mathbf{v}^\top \mathbf{x}_i \leq -c Z_i Q_i + c Z_i Q_i \ell(y_i \mathbf{v}^\top \mathbf{x}_i). \quad (14)$$

Re-arranging, and substituting (14) in (13),

$$\begin{aligned} & \frac{1}{2} \sum_i Z_i Q_i \left( \hat{p}_i^2 - 2y_i \hat{p}_i - \frac{r_i}{1+r_i} + r_i \hat{p}_i^2 + 2c \right) \\ & \leq \frac{1}{2} c^2 \mathbf{v}^\top A_{\mathbf{v}} \mathbf{v} + c \sum_i Z_i Q_i \ell(y_i \mathbf{v}^\top \mathbf{x}_i). \quad (15) \end{aligned}$$

We now split the first sum into two alternatives, depending whether an update error was performed  $i \in \mathcal{M}$  or an update which is not an error  $i \in \mathcal{U}$ . We start with the first case of an error  $i \in \mathcal{M}$ , in which we have,  $-y_i \hat{p}_i = |\hat{p}_i|$ , and consider two subcases, depending whether the function  $\Theta(|\hat{p}_i|, r_i)$  is positive ( $i \in \mathcal{S} \cap \mathcal{M}$ ) or negative ( $i \in \mathcal{A} \cap \mathcal{M}$ ). In the former subcase  $Q_i$  is random variable with expectation  $\mathbb{E}[Q_i] = \frac{2c}{2c + \Theta(|\hat{p}_i|, r_i)}$  and thus

$$\mathbb{E} \left[ Z_i Q_i \left( \hat{p}_i^2 - 2y_i \hat{p}_i - \frac{r_i}{1+r_i} + r_i \hat{p}_i^2 + 2c \right) \right] = 2c \mathbb{E}[Z_i].$$

In the later subcase,  $Q_i = 1$  (be definition), and we bound,

$$\begin{aligned} & \mathbb{E} \left[ Z_i Q_i \left( \hat{p}_i^2 - 2y_i \hat{p}_i - \frac{r_i}{1+r_i} + r_i \hat{p}_i^2 + 2c \right) \right] \\ & \geq 2c \mathbb{E}[Z_i] - \frac{r_i}{1+r_i}. \end{aligned}$$

Now we consider examples for which an update (that is not a mistake) was performed, that is  $0 \leq y_i \hat{p}_i$ , and by definition  $i \in \mathcal{U}$ . Such cases occur only when  $i \in \mathcal{A}$ , that is  $i \in \mathcal{U} \cap \mathcal{A}$ . Updates in this case are performed when the margin is negative or causing an aggressive update (see Fig. 1), thus

$$0 \leq y_i \hat{p}_i \leq \theta(r_i) \leq \frac{1 - \sqrt{1-r_i}}{1+r_i},$$

where the last inequality follows (12). We thus bound,

$$\begin{aligned} & \hat{p}_i^2 - 2y_i \hat{p}_i - \frac{r_i}{1+r_i} + r_i \hat{p}_i^2 + 2c \\ & = (1+r_i) \hat{p}_i^2 - 2y_i \hat{p}_i + \frac{r_i}{1+r_i} - 2 \frac{r_i}{1+r_i} + 2c \\ & = f(y_i \hat{p}_i) - 2 \frac{r_i}{1+r_i} + 2c \end{aligned}$$

where  $f(y_i \hat{p}_i) = (1+r_i) \hat{p}_i^2 - 2y_i \hat{p}_i + \frac{r_i}{1+r_i}$  is a quadratic equation with two non-negative roots and a minima,  $\frac{1 \pm \sqrt{1-r_i}}{1+r_i}$ . Thus, if  $y_i \hat{p}_i$  is lower than the smaller root,  $y_i \hat{p}_i \leq \frac{1 - \sqrt{1-r_i}}{1+r_i}$  then  $f(y_i \hat{p}_i) \geq 0$ , and we bound,

$$\begin{aligned} & \mathbb{E} \left[ Z_i Q_i \left( \hat{p}_i^2 - 2y_i \hat{p}_i - \frac{r_i}{1+r_i} + r_i \hat{p}_i^2 + 2c \right) \right] \\ & \geq 2c \mathbb{E}[Z_i] - \frac{2r_i}{1+r_i}. \end{aligned}$$

To summarize,

$$\begin{aligned} & \frac{1}{2} \sum_i \mathbb{E} \left[ Z_i Q_i \left( \hat{p}_i^2 + 2|\hat{p}_i| - \frac{r_i}{1+r_i} + r_i \hat{p}_i^2 + 2c \right) \right] \\ & \geq c \sum_{i \in \mathcal{M}} \mathbb{E} [Z_i] + c \sum_{i \in \mathcal{U}} \mathbb{E} [Z_i] \\ & \quad - \frac{1}{2} \mathbb{E} \left[ \sum_{i \in \mathcal{A} \cap \mathcal{M}} \frac{r_i}{1+r_i} \right] - \mathbb{E} \left[ \sum_{i \in \mathcal{A} \cap \mathcal{U}} \frac{r_i}{1+r_i} \right]. \end{aligned} \quad (16)$$

Taking the expectation of (15), using (16) to lower bound the left-hand-side concludes the proof, and the definitions,  $M = \sum_{i \in \mathcal{M}} Z_i$  and  $U = \sum_{i \in \mathcal{U}} Z_i$  we get,

$$\begin{aligned} \mathbb{E} [M] & \leq \frac{1}{2} c \mathbf{v}^\top \mathbb{E} [A_{\mathbf{v}}] \mathbf{v} + \mathbb{E} \left[ \sum_i Z_i Q_i \ell(y_i \mathbf{v}^\top \mathbf{x}_i) \right] \\ & \quad + \frac{1}{2c} \mathbb{E} \left[ \sum_{i \in \mathcal{A} \cap \mathcal{M}} \frac{r_i}{1+r_i} \right] \\ & \quad + \frac{1}{c} \mathbb{E} \left[ \sum_{i \in \mathcal{A} \cap \mathcal{U}} \frac{r_i}{1+r_i} \right] - \mathbb{E} [U] \\ & \leq \frac{1}{2} c \mathbf{v}^\top \mathbb{E} [A_{\mathbf{v}}] \mathbf{v} + \mathbb{E} \left[ \sum_i Z_i Q_i \ell(y_i \mathbf{v}^\top \mathbf{x}_i) \right] \\ & \quad + \frac{1}{c} \mathbb{E} \left[ \sum_{i \in \mathcal{A}} \frac{r_i}{1+r_i} \right] - \mathbb{E} [U]. \end{aligned}$$

### A.3 Proof of Thm. 2

**Proof:** Similar the argument in beginning of Thm. 1, [22, Theorem 1] stated,

$$\begin{aligned} & \sum_i Z_i Q_i (y_i - \hat{p}_i)^2 \\ & = \min_{\mathbf{v}} \left( b \|\mathbf{v}\|^2 + \sum_i Z_i Q_i a_i (y_i - \mathbf{v}^\top \mathbf{x}_i)^2 \right) \\ & \leq b \|\mathbf{v}\|^2 + \sum_i Z_i Q_i a_i (y_i - \mathbf{v}^\top \mathbf{x}_i)^2 \end{aligned}$$

Expanding the two square terms,

$$\begin{aligned} & \sum_i Z_i Q_i (y_i^2 - 2y_i \hat{p}_i + \hat{p}_i^2) \\ & \leq b \|\mathbf{v}\|^2 + \sum_i Z_i Q_i a_i (y_i^2 - 2y_i \mathbf{v}^\top \mathbf{x}_i + \mathbf{v}^\top \mathbf{x}_i \mathbf{x}_i^\top \mathbf{v}). \end{aligned} \quad (17)$$

Rearranging (17) and using both  $y_i^2 = 1$  and (11),

$$\begin{aligned} & \sum_i Z_i Q_i (1 - a_i - 2y_i \hat{p}_i + \hat{p}_i^2) \\ & \leq b \|\mathbf{v}\|^2 + \sum_i Z_i Q_i a_i \mathbf{v}^\top \mathbf{x}_i \mathbf{x}_i^\top \mathbf{v} - 2 \sum_i Z_i Q_i a_i y_i \mathbf{v}^\top \mathbf{x}_i \\ & = \mathbf{v}^\top A_{\mathbf{v}}^a \mathbf{v} - 2 \sum_i Z_i Q_i a_i y_i \mathbf{v}^\top \mathbf{x}_i. \end{aligned} \quad (18)$$

We use again the relation (14). Substituting in (18) together with the bound [22, Eq. 30],

$$1 \leq a_i \leq \frac{b}{b-1}, \quad a_i - 1 \leq \left( \frac{b}{b-1} \right)^2 \frac{r_i}{1+r_i}$$

we obtain,

$$\begin{aligned} & \sum_i Z_i Q_i \left( -\frac{r_i}{1+r_i} - 2y_i \hat{p}_i + \hat{p}_i^2 + 2ca_i \right) \\ & \leq c^2 \mathbf{v}^\top A_{\mathbf{v}}^a \mathbf{v} + 2 \sum_i Z_i Q_i \frac{bc}{b-1} \ell(y_i \mathbf{x}_i^\top \mathbf{v}) \\ & \quad + \left( \left( \frac{b}{b-1} \right)^2 - 1 \right) \sum_i Z_i Q_i \frac{r_i}{1+r_i}. \end{aligned} \quad (19)$$

As before, split the first sum into two alternatives, depending whether an update error was performed  $i \in \mathcal{M}$  or an update which is not an error  $i \in \mathcal{U}$ . We start with the first case of an error  $i \in \mathcal{M}$ , in which we have,  $-y_i \hat{p}_i = |\hat{p}_i|$ , and consider two subcases, depending whether the function  $\Gamma(|\hat{p}_i|, r_i)$  is positive ( $i \in \mathcal{S} \cap \mathcal{M}$ ) or negative ( $i \in \mathcal{A} \cap \mathcal{M}$ ). In the former subcase  $Q_i$  is random variable with expectation  $\mathbb{E} [Q_i] = \frac{2ca_i}{2ca_i + \Gamma(|\hat{p}_i|, r_i)}$  and thus,

$$\begin{aligned} & \mathbb{E} \left[ Z_i Q_i \left( \hat{p}_i^2 - 2y_i \hat{p}_i - \frac{r_i}{1+r_i} + 2ca_i \right) \right] = 2c \mathbb{E} [Z_i a_i] \\ & \geq 2c \mathbb{E} [Z_i]. \end{aligned}$$

In the later subcase,  $Q_i = 1$  (be definition), and we bound,

$$\begin{aligned} & \mathbb{E} \left[ Z_i Q_i \left( \hat{p}_i^2 - 2y_i \hat{p}_i - \frac{r_i}{1+r_i} + 2ca_i \right) \right] \\ & \geq 2c \mathbb{E} [Z_i] - \frac{r_i}{1+r_i}. \end{aligned}$$

Now we consider examples for which an update (that is not a mistake) was performed, that is  $0 \leq y_i \hat{p}_i$ , and by definition  $i \in \mathcal{U}$ . Such cases occur only when  $i \in \mathcal{A}$ , that is  $i \in \mathcal{U} \cap \mathcal{A}$ . Updates in this case are performed when the margin is negative or causing an aggressive update (see Fig. 1 ),

$$0 \leq y_i \hat{p}_i \leq \gamma(r_i) \leq 1 - \sqrt{1 - \frac{r_i}{1+r_i}},$$

where the last inequality follows (12). We thus bound,

$$\begin{aligned} & \hat{p}_i^2 - 2|\hat{p}_i| - \frac{r_i}{1+r_i} + 2ca_i \\ &= \hat{p}_i^2 - 2|\hat{p}_i| + \frac{r_i}{1+r_i} - 2\frac{r_i}{1+r_i} + 2ca_i \\ &= f(y_i\hat{p}_i) - 2\frac{r_i}{1+r_i} + 2ca_i, \end{aligned}$$

where  $f(y_i\hat{p}_i) = \hat{p}_i^2 - 2|\hat{p}_i| + \frac{r_i}{1+r_i}$  is a quadratic equation with two non-negative roots and a minima,  $\frac{1 \pm \sqrt{1-r_i}}{1+r_i}$ . Thus, if  $y_i\hat{p}_i$  is lower than the smaller root,  $y_i\hat{p}_i \leq 1 - \sqrt{1 - \frac{r_i}{1+r_i}}$  then  $f(y_i\hat{p}_i) \geq 0$ , and we bound,

$$\begin{aligned} & \mathbb{E} \left[ Z_i Q_i \left( \hat{p}_i^2 - 2y_i\hat{p}_i - \frac{r_i}{1+r_i} + 2ca_i \right) \right] \\ & \geq 2c\mathbb{E}[Z_i] - \frac{2r_i}{1+r_i}. \end{aligned}$$

To summarize,

$$\begin{aligned} & \frac{1}{2} \sum_i \mathbb{E} \left[ Z_i Q_i \left( \hat{p}_i^2 + 2|\hat{p}_i| - \frac{r_i}{1+r_i} + 2ca_i \right) \right] \\ & \geq \frac{1}{2}c \sum_{i \in \mathcal{M}} \mathbb{E}[Z_i] + \frac{1}{2}c \sum_{i \in \mathcal{U}} \mathbb{E}[Z_i] \\ & \quad - \frac{1}{2} \mathbb{E} \left[ \sum_{i \in \mathcal{A} \cap \mathcal{M}} \frac{r_i}{1+r_i} \right] - \mathbb{E} \left[ \sum_{i \in \mathcal{A} \cap \mathcal{U}} \frac{r_i}{1+r_i} \right]. \quad (20) \end{aligned}$$

Taking the expectation of (19), using (20) to lower bound the left-hand-side concludes the proof, and the definitions,  $M = \sum_{i \in \mathcal{M}} Z_i$  and  $U = \sum_{i \in \mathcal{U}} Z_i$  we get,

$$\begin{aligned} \mathbb{E}[M] & \leq \frac{1}{2} \mathbf{c} \mathbf{v}^\top \mathbb{E}[A_{\mathbf{v}}^a] \mathbf{v} + \frac{b}{b-1} \mathbb{E} \left[ \sum_i Z_i Q_i \ell(y_i \mathbf{v}^\top \mathbf{x}_i) \right] \\ & \quad + \frac{1}{2c} \mathbb{E} \left[ \sum_{i \in \mathcal{A} \cap \mathcal{M}} \frac{r_i}{1+r_i} \right] + \frac{1}{c} \mathbb{E} \left[ \sum_{i \in \mathcal{A} \cap \mathcal{U}} \frac{r_i}{1+r_i} \right] \\ & \quad + \frac{1}{c} \left( \left( \frac{b}{b-1} \right)^2 - 1 \right) \sum_{i \in \mathcal{M} \cup \mathcal{U}} \mathbb{E} \left[ Z_i Q_i \frac{r_i}{1+r_i} \right] - \mathbb{E}[U] \\ & \leq \frac{1}{2} \mathbf{c} \mathbf{v}^\top \mathbb{E}[A_{\mathbf{v}}^a] \mathbf{v} + \frac{b}{b-1} \mathbb{E} \left[ \sum_i Z_i Q_i \ell(y_i \mathbf{v}^\top \mathbf{x}_i) \right] \\ & \quad + \frac{1}{c} \left( \left( \frac{b}{b-1} \right)^2 + 1 \right) \mathbb{E} \left[ \sum_{i \in \mathcal{M} \cup \mathcal{U}} \frac{r_i}{1+r_i} \right] - \mathbb{E}[U]. \end{aligned}$$

■

Table 4: Average number of queries and test error results for six algorithms for 10 binary classification problems based on the RCV1 dataset.

|                  |           | RAND    |             | BBQ     |              | CBGZ-ridge |             | DAGGER-ridge |                    | DAGGER-wemm |             | AROW    |             |
|------------------|-----------|---------|-------------|---------|--------------|------------|-------------|--------------|--------------------|-------------|-------------|---------|-------------|
|                  |           | queries | error       | queries | error        | queries    | error       | queries      | error              | queries     | error       | queries | error       |
| queries < 25000  | CCAT ECAT | 11,809  | 5.26 (0.30) | 14,409  | 6.98 (0.34)  | 23,448     | 3.25 (0.12) | 20,831       | <b>2.44</b> (0.04) | 21,014      | 2.52 (0.03) | 355,360 | 2.23 (0.04) |
|                  | CCAT GCAT | 14,006  | 3.69 (0.23) | 0       | 63.54 (0.11) | 21,393     | 2.29 (0.12) | 18,741       | <b>1.62</b> (0.03) | 20,279      | 1.70 (0.03) | 419,648 | 1.47 (0.03) |
|                  | CCAT MCAT | 14,338  | 4.38 (0.23) | 0       | 33.57 (0.13) | 21,305     | 2.63 (0.05) | 19,262       | <b>1.98</b> (0.02) | 19,411      | 2.06 (0.04) | 429,676 | 1.80 (0.01) |
|                  | ECAT GCAT | 14,560  | 3.95 (0.20) | 0       | 28.16 (0.10) | 19,977     | 2.75 (0.17) | 18,518       | <b>2.09</b> (0.07) | 17,030      | 2.19 (0.06) | 218,603 | 1.89 (0.05) |
|                  | ECAT MCAT | 15,899  | 4.89 (0.36) | 9,881   | 10.03 (1.01) | 21,039     | 3.36 (0.10) | 20,663       | <b>2.55</b> (0.04) | 19,155      | 2.61 (0.04) | 238,628 | 2.33 (0.04) |
|                  | MCAT GCAT | 11,545  | 2.68 (0.20) | 0       | 46.02 (0.12) | 21,313     | 1.58 (0.03) | 17,984       | <b>1.15</b> (0.02) | 20,835      | 1.23 (0.03) | 346,270 | 1.07 (0.03) |
|                  | CCAT      | 18,271  | 5.46 (0.13) | 3,216   | 17.52 (2.21) | 23,582     | 3.64 (0.06) | 22,926       | <b>2.67</b> (0.03) | 20,791      | 2.76 (0.01) | 548,056 | 2.37 (0.02) |
|                  | ECAT      | 18,253  | 3.16 (0.12) | 6,708   | 6.53 (0.21)  | 19,780     | 2.07 (0.03) | 19,640       | <b>1.53</b> (0.03) | 19,248      | 1.60 (0.02) | 548,056 | 1.43 (0.03) |
|                  | GCAT      | 18,232  | 2.42 (0.14) | 2,736   | 6.48 (1.62)  | 20,340     | 1.41 (0.03) | 19,077       | <b>0.91</b> (0.02) | 18,877      | 0.97 (0.02) | 548,056 | 0.82 (0.02) |
|                  | MCAT      | 18,369  | 3.78 (0.23) | 8,088   | 13.62 (1.36) | 21,008     | 2.34 (0.11) | 19,062       | <b>1.67</b> (0.02) | 20,701      | 1.71 (0.05) | 548,056 | 1.51 (0.04) |
| queries < 50000  | CCAT ECAT | 35,482  | 4.29 (0.22) | 42,036  | 5.30 (0.16)  | 46,529     | 3.08 (0.05) | 42,255       | <b>2.42</b> (0.04) | 38,226      | 2.49 (0.04) | 355,360 | 2.23 (0.04) |
|                  | CCAT GCAT | 41,954  | 3.05 (0.10) | 0       | 63.54 (0.11) | 43,187     | 2.16 (0.06) | 36,897       | <b>1.61</b> (0.01) | 36,609      | 1.68 (0.04) | 419,648 | 1.47 (0.03) |
|                  | CCAT MCAT | 42,883  | 3.74 (0.23) | 25,460  | 7.58 (0.76)  | 43,400     | 2.54 (0.10) | 38,811       | <b>1.96</b> (0.04) | 35,648      | 2.04 (0.03) | 429,676 | 1.80 (0.01) |
|                  | ECAT GCAT | 43,751  | 3.40 (0.22) | 39,384  | 6.31 (0.80)  | 47,920     | 2.62 (0.09) | 39,539       | <b>2.06</b> (0.06) | 43,612      | 2.15 (0.06) | 218,603 | 1.89 (0.05) |
|                  | ECAT MCAT | 39,824  | 4.37 (0.23) | 37,003  | 7.94 (0.77)  | 41,509     | 3.21 (0.11) | 36,696       | <b>2.52</b> (0.06) | 35,018      | 2.62 (0.05) | 238,628 | 2.33 (0.04) |
|                  | MCAT GCAT | 34,636  | 2.17 (0.13) | 0       | 46.02 (0.12) | 43,120     | 1.55 (0.04) | 40,951       | <b>1.15</b> (0.03) | 37,922      | 1.22 (0.03) | 346,270 | 1.07 (0.03) |
|                  | CCAT      | 36,703  | 5.05 (0.19) | 3,216   | 17.52 (2.21) | 46,976     | 3.37 (0.05) | 39,700       | <b>2.60</b> (0.04) | 42,266      | 2.71 (0.01) | 548,056 | 2.37 (0.02) |
|                  | ECAT      | 36,532  | 2.85 (0.07) | 6,708   | 6.53 (0.21)  | 40,953     | 1.97 (0.05) | 34,733       | <b>1.52</b> (0.04) | 35,564      | 1.59 (0.03) | 548,056 | 1.43 (0.03) |
|                  | GCAT      | 36,489  | 2.38 (0.35) | 2,736   | 6.48 (1.62)  | 41,383     | 1.27 (0.04) | 40,761       | <b>0.92</b> (0.02) | 34,467      | 0.98 (0.02) | 548,056 | 0.82 (0.02) |
|                  | MCAT      | 36,542  | 3.23 (0.24) | 8,088   | 13.62 (1.36) | 43,090     | 2.20 (0.11) | 38,523       | <b>1.63</b> (0.03) | 37,315      | 1.68 (0.04) | 548,056 | 1.51 (0.04) |
| queries < 100000 | CCAT ECAT | 82,909  | 3.79 (0.04) | 74,711  | 4.78 (0.16)  | 91,057     | 3.04 (0.05) | 63,865       | <b>2.42</b> (0.02) | 59,145      | 2.49 (0.03) | 355,360 | 2.23 (0.04) |
|                  | CCAT GCAT | 84,014  | 2.79 (0.09) | 45,729  | 4.76 (0.43)  | 85,096     | 2.06 (0.05) | 70,422       | <b>1.61</b> (0.02) | 69,709      | 1.66 (0.04) | 419,648 | 1.47 (0.03) |
|                  | CCAT MCAT | 85,732  | 3.33 (0.15) | 58,353  | 6.10 (0.29)  | 87,427     | 2.46 (0.06) | 74,771       | <b>1.97</b> (0.03) | 69,960      | 2.01 (0.04) | 429,676 | 1.80 (0.01) |
|                  | ECAT GCAT | 65,599  | 3.19 (0.12) | 39,384  | 6.31 (0.80)  | 71,451     | 2.64 (0.11) | 39,539       | <b>2.06</b> (0.06) | 43,612      | 2.15 (0.06) | 218,603 | 1.89 (0.05) |
|                  | ECAT MCAT | 71,373  | 3.98 (0.12) | 65,837  | 6.82 (0.51)  | 77,841     | 3.25 (0.03) | 44,888       | <b>2.52</b> (0.06) | 42,829      | 2.64 (0.03) | 238,628 | 2.33 (0.04) |
|                  | MCAT GCAT | 80,748  | 1.91 (0.06) | 81,336  | 3.49 (0.56)  | 84,463     | 1.52 (0.04) | 51,039       | <b>1.15</b> (0.04) | 57,702      | 1.21 (0.04) | 346,270 | 1.07 (0.03) |
|                  | CCAT      | 91,279  | 4.39 (0.20) | 58,233  | 11.08 (1.39) | 95,560     | 3.27 (0.09) | 87,712       | <b>2.56</b> (0.01) | 80,371      | 2.65 (0.02) | 548,056 | 2.37 (0.02) |
|                  | ECAT      | 72,992  | 2.81 (0.06) | 6,708   | 6.53 (0.21)  | 84,122     | 1.90 (0.05) | 69,718       | <b>1.54</b> (0.03) | 70,069      | 1.58 (0.01) | 548,056 | 1.43 (0.03) |
|                  | GCAT      | 72,986  | 1.83 (0.09) | 64,671  | 3.28 (0.68)  | 83,104     | 1.26 (0.03) | 79,874       | <b>0.91</b> (0.03) | 66,697      | 0.95 (0.01) | 548,056 | 0.82 (0.02) |
|                  | MCAT      | 73,087  | 3.05 (0.07) | 8,088   | 13.62 (1.36) | 88,594     | 2.13 (0.08) | 74,872       | <b>1.62</b> (0.02) | 73,548      | 1.67 (0.03) | 548,056 | 1.51 (0.04) |

Table 5: Average number of queries and test error results for six algorithms for three binary classification problems based on the sentiment dataset.

|                  |          | RAND    |                     | BBQ     |              | CBGZ-ridge |              | DAGGER-ridge |                     | DAGGER-wemm |                     | AROW    |              |
|------------------|----------|---------|---------------------|---------|--------------|------------|--------------|--------------|---------------------|-------------|---------------------|---------|--------------|
|                  |          | queries | error               | queries | error        | queries    | error        | queries      | error               | queries     | error               | queries | error        |
| queries < 50000  | Amazon 4 | 25,516  | <b>29.59</b> (1.14) | 37,416  | 29.12 (1.05) | 48,347     | 23.54 (0.53) | -            | - (-)               | -           | - (-)               | 765,424 | 19.48 (0.18) |
|                  | Amazon 3 | 25,593  | 8.62 (0.52)         | 14,069  | 11.12 (1.48) | 49,632     | 5.89 (0.22)  | -            | - (-)               | 47,202      | <b>4.32</b> (0.10)  | 765,424 | 3.73 (0.04)  |
|                  | Amazon 1 | 25,515  | 7.56 (0.68)         | 18,598  | 7.06 (0.52)  | 43,549     | 5.35 (0.14)  | 43,287       | <b>4.37</b> (0.12)  | 42,103      | 4.60 (0.20)         | 765,424 | 4.13 (0.05)  |
| queries < 100000 | Amazon 4 | 76,694  | 28.44 (1.13)        | 37,416  | 29.12 (1.05) | 94,716     | 23.50 (0.48) | -            | - (-)               | 93,071      | <b>20.38</b> (0.26) | 765,424 | 19.48 (0.18) |
|                  | Amazon 3 | 76,304  | 7.92 (0.34)         | 96,134  | 7.95 (0.59)  | 96,706     | 5.70 (0.30)  | 95,753       | <b>3.94</b> (0.16)  | 87,776      | 4.06 (0.16)         | 765,424 | 3.73 (0.04)  |
|                  | Amazon 1 | 76,554  | 6.97 (0.23)         | 18,598  | 7.06 (0.52)  | 88,039     | 5.42 (0.22)  | 83,840       | <b>4.26</b> (0.06)  | 74,582      | 4.50 (0.04)         | 765,424 | 4.13 (0.05)  |
| queries < 150000 | Amazon 4 | 127,472 | 28.06 (0.97)        | 101,647 | 27.73 (0.75) | 146,741    | 23.62 (0.61) | 140,657      | <b>19.96</b> (0.17) | 136,259     | 20.56 (0.26)        | 765,424 | 19.48 (0.18) |
|                  | Amazon 3 | 127,799 | 7.28 (0.45)         | 96,134  | 7.95 (0.59)  | 149,158    | 5.57 (0.41)  | 135,749      | <b>3.94</b> (0.10)  | 139,086     | 4.17 (0.10)         | 765,424 | 3.73 (0.04)  |
|                  | Amazon 1 | 127,434 | 6.37 (0.38)         | 116,984 | 6.31 (0.10)  | 138,964    | 5.23 (0.28)  | 134,827      | <b>4.28</b> (0.10)  | 126,939     | 4.42 (0.15)         | 765,424 | 4.13 (0.05)  |
| queries < 200000 | Amazon 4 | 179,052 | 27.30 (0.53)        | 101,647 | 27.73 (0.75) | 180,405    | 24.10 (0.36) | 177,854      | <b>19.96</b> (0.22) | 177,543     | 20.78 (0.15)        | 765,424 | 19.48 (0.18) |
|                  | Amazon 3 | 178,764 | 7.14 (0.53)         | 96,134  | 7.95 (0.59)  | 182,867    | 5.70 (0.19)  | 179,273      | <b>3.89</b> (0.21)  | 163,613     | 4.26 (0.15)         | 765,424 | 3.73 (0.04)  |
|                  | Amazon 1 | 153,328 | 6.54 (0.36)         | 116,984 | 6.31 (0.10)  | 171,912    | 5.52 (0.32)  | 159,887      | <b>4.31</b> (0.17)  | 152,422     | 4.43 (0.18)         | 765,424 | 4.13 (0.05)  |

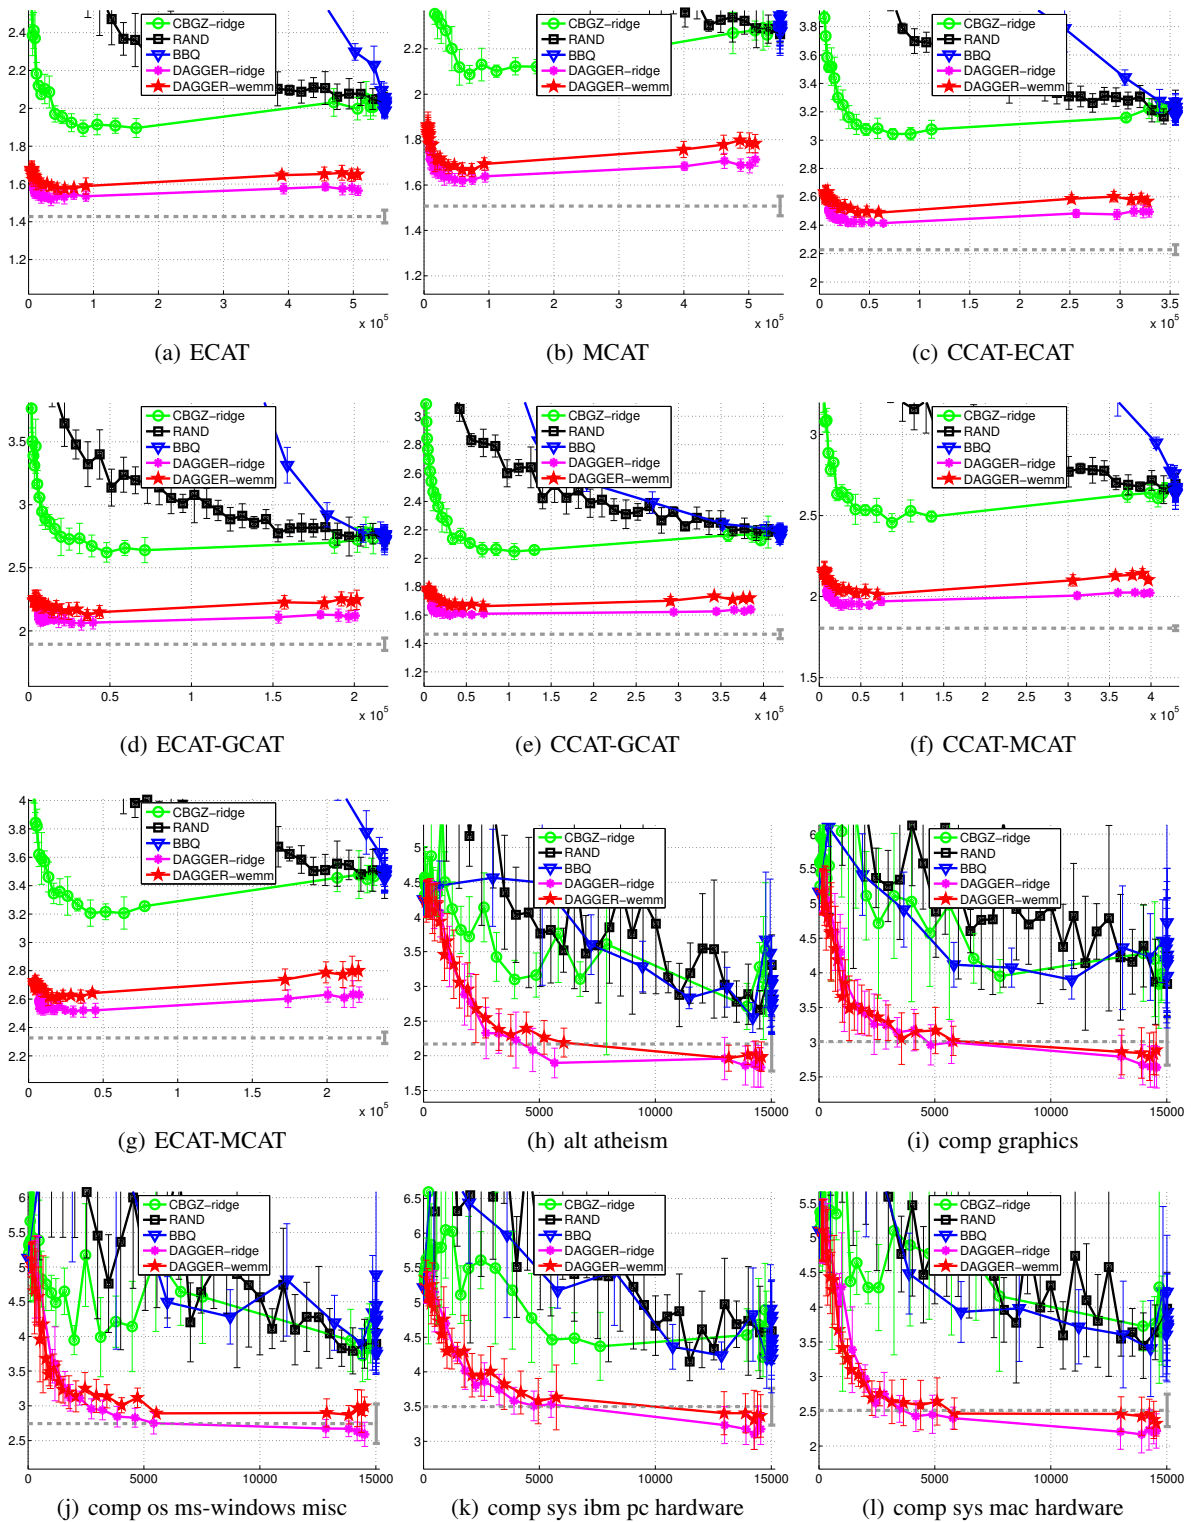

Figure 4: More results: error vs no of queries labels for 12 datasets: 1vs-rest RCV (2 datasets), 1vs1 RCV (4 datasets) and 20NG (5 datasets).

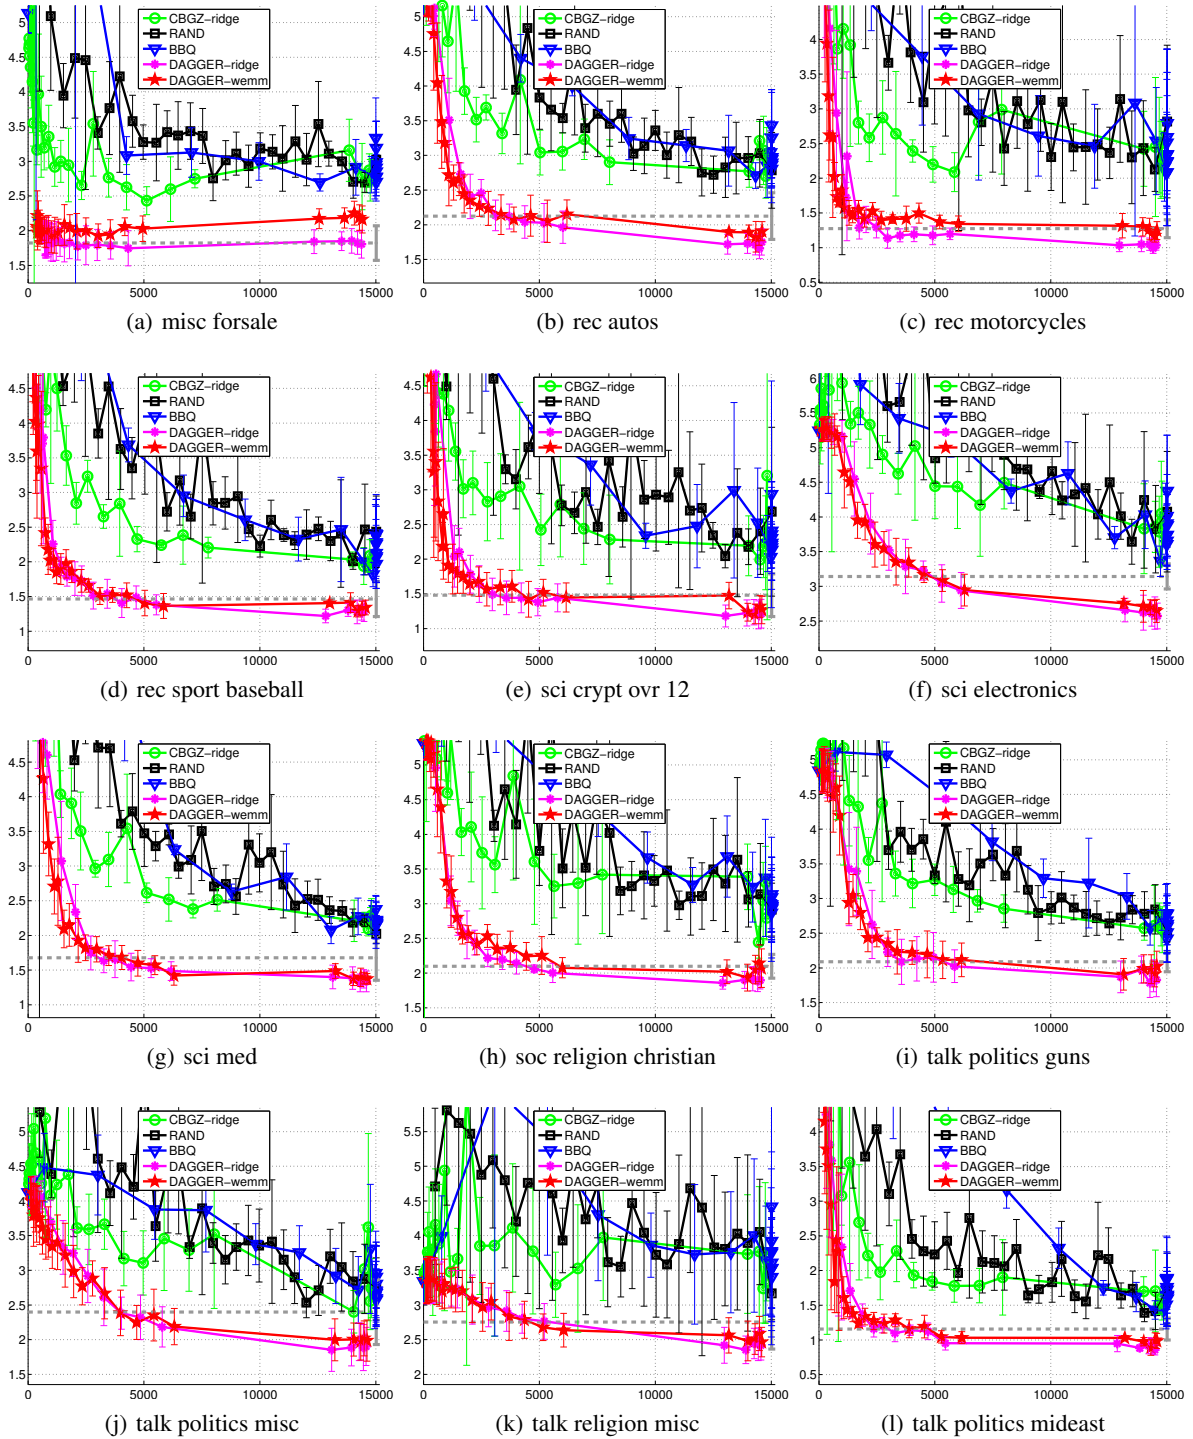

Figure 5: More results: error vs no of queries labels for 12 datasets of 1vs-rest 20NG 1vs-rest.
